# Supplementary material
Source: publisher figshare collection journal article supplement (https://frontiersin.figshare.com/ndownloader/files/35164924)
Supplement: Supplementary file [file 35164924]

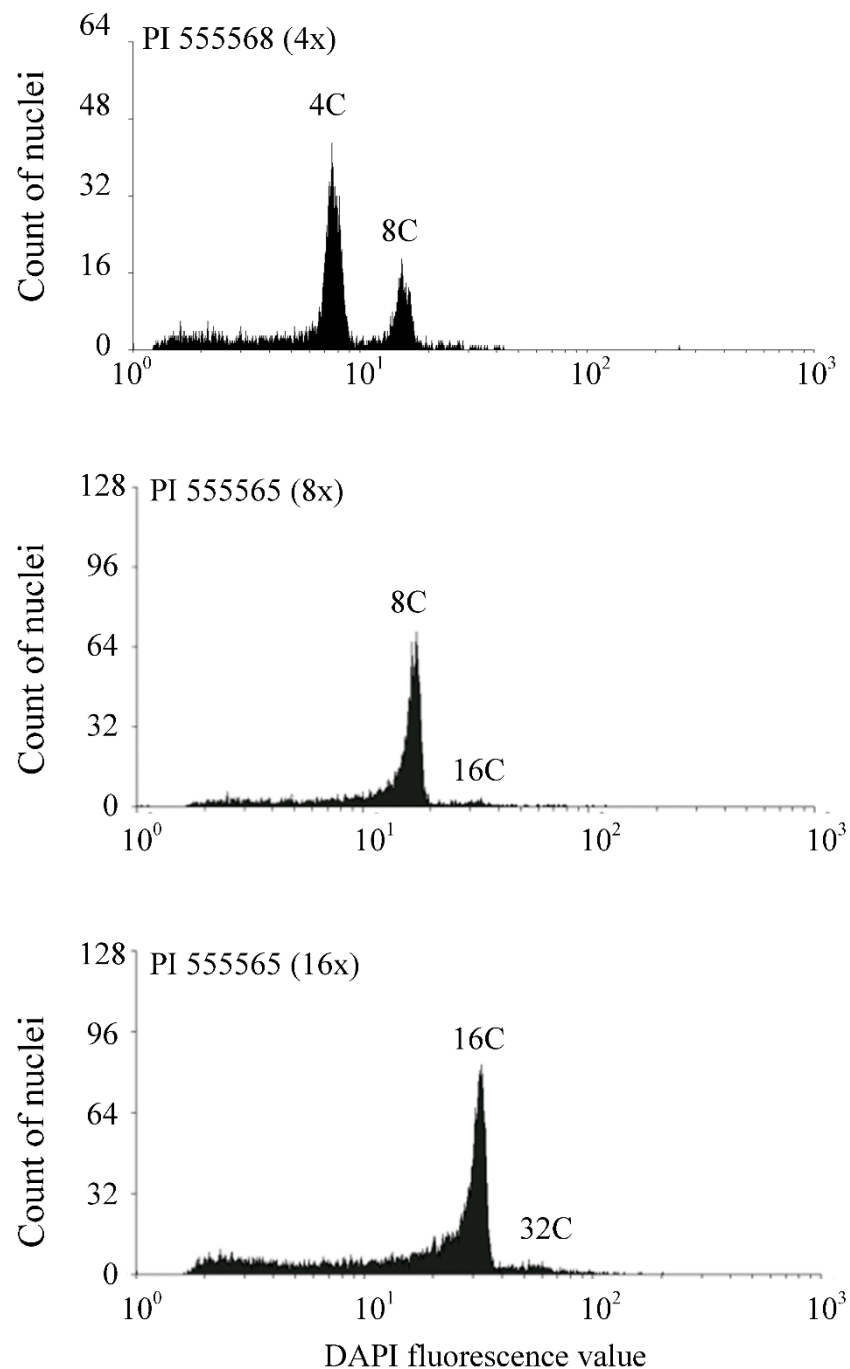

**Supplementary Figure 1.** Confirmation of the ploidy level in the neopolyploid PI 555565 (16x). Ploidy levels were determined based on the G<sub>1</sub> peak obtained by measuring nuclear DNA content by flow cytometry. PI 555568 (4x) and PI 555565 (8x) were used as external controls.
